## **Do people with low back pain walk differently? A systematic review and meta-analysis**

**Jo Armour Smith<sup>1</sup>, Heidi Stabbert<sup>1</sup>, Jennifer J. Bagwell<sup>2</sup>, Hsiang-Ling Teng<sup>2</sup>, Vernie Wade<sup>1</sup>, Szu-Ping Lee<sup>3</sup>**

<sup>1</sup>Department of Physical Therapy, Chapman University, Irvine, CA, 92618, United States

<sup>2</sup>Department of Physical Therapy, California State University, Long Beach, Long Beach, CA, 90840, United States.

<sup>3</sup>Department of Physical Therapy, University of Nevada, Las Vegas, Las Vegas, NV, 89154, United States

Corresponding author: Jo Armour Smith

Email: [josmith@chapman.edu](mailto:josmith@chapman.edu)

2

## ABSTRACT

### Objective

To identify differences in biomechanics during gait in individuals with acute and persistent low back pain compared with back-healthy controls.

### Design

Systematic review

### Data Sources

A search was conducted in PubMed, CINAHL, SPORTDiscus, and PsycINFO in June 2019 and was repeated in December 2020.

### Eligibility criteria

Studies were included if they reported biomechanical characteristics of individuals with and without low back pain during steady-state or perturbed walking and running. Biomechanical data included spatiotemporal, kinematic, kinetic, and electromyography variables. The reporting quality and potential for bias of each study was assessed. Data were pooled where possible to compare the standardized mean differences (SMD) between groups.

### Results

Ninety-seven studies were included. Two studies investigated acute pain and the rest investigated persistent pain. Eight studies investigated running gait. 20% of studies had high reporting quality/low risk of bias. In comparison with back-healthy controls, individuals with persistent low back pain walked more slowly (SMD -0.59 [95% CI -0.77 to -0.42]) and with shorter stride length (-0.38 [-0.60 to -0.16]). There were no differences in the amplitude of motion in the thoracic or lumbar spine, pelvis, or hips in individuals with LBP. During walking, coordination of motion between the thorax and the lumbar spine/pelvis was significantly more in-phase in the LBP groups (-0.60 [-0.90 to -0.30]), and individuals with LBP exhibited greater amplitude of activation in the paraspinal muscles (0.52 [0.23 to 0.80]).

### Summary/Conclusion

There is moderate to strong evidence that individuals with persistent LBP demonstrate impairments in walking gait compared with back-healthy controls.

## INTRODUCTION

The experience of acute low back pain (LBP) is almost universal, with up to 80% of people experiencing an acute episode of LBP in their lifetimes[1]. However, the greatest burden to individuals and society comes from the pain and disability associated with persistent LBP[2,3]. Persistent LBP is characterized by symptoms lasting or recurring over months and years[4]. Recently, researchers have differentiated between persistent LBP that is experienced almost every day (chronic LBP) and persistent LBP that follows a more episodic pattern (recurrent LBP)[5,6]. Although there are attempts to standardize definitions for recurrent and chronic patterns of persistent LBP[5,7,8], these definitions have not yet been widely adopted.

Walking and running gait are frequently assessed in individuals with acute and persistent LBP during clinical evaluations and as part of observational and interventional research. Biomechanical gait impairments in individuals with LBP may be captured by changes in spatiotemporal characteristics like speed or step length, kinematic characteristics like joint/segmental motion or coordination between joints/segments, kinetic characteristics like forces and torques, and electromyography (EMG) characteristics like amplitude or timing of muscle activation. The amount of trunk motion and joint loading during gait is relatively low[9–11]. Despite this, due to the repetitive, cyclical nature of walking and running, it is theorized that adverse loading over time in response to changes in gait mechanics in the trunk or lower limbs may contribute to the onset or recurrence of LBP symptoms. Recent work has highlighted the inconsistent evidence for biomechanical impairments during tasks such as gait in individuals with persistent LBP[12]. In part, this inconsistency is due to heterogeneity in clinical back pain presentations[12] and is worsened by small sample sizes in individual studies. In order to develop appropriate rehabilitation strategies for back pain, it is critical to first determine if there are biomechanical impairments during important functional activities such as walking and running that generalize across individuals with LBP. Of the two recent reviews investigating gait in individuals with LBP[13,14], neither performed a quantitative synthesis of the results, and one only included EMG data[14].

The aims of this systematic review therefore were to review and quantitatively synthesize evidence for differences in walking and running gait biomechanics in individuals with acute and persistent low back pain compared with back-healthy controls.

## METHODS

This review was conducted based on the Preferred Reporting Items for Systematic Reviews and Meta-Analyses guidelines (PRISMA). The protocol was registered in the International Prospective Register of Systematic Reviews (PROSPERO: CRD42018078746).

### Search Strategy

The search was conducted in the PubMed, CINAHL, SPORTDiscus, and PsycINFO databases in June 2019, without date restriction. The search terms combined keywords or MeSH terms for gait AND low back pain and were tailored for specific databases. The search strategy is shown in full in the supplementary material. After removal of duplicates, two authors (JAS and VW) double screened title and abstracts based on the inclusion criteria (described in detail below). Full text manuscripts of remaining articles were then retrieved and additionally screened. Reference lists from retrieved articles, previous systematic reviews, and NCBI citation alerts

were also checked. In September 2020, the search was repeated using identical search terms in the same databases to identify studies published since the original search.

#### Inclusion criteria

Included studies had to be peer reviewed, original research works that were available in English. Eligible studies compared gait variables between a group of individuals with acute or persistent LBP, and a group of back-healthy controls. Study types included case-control, cross-sectional or prospective cohort studies. Studies had to include objectively quantified gait data in one or more of the following categories: 1) spatiotemporal data (speed, distance, step and stride characteristics); 2) kinematic data (peak excursion or total range of motion in the thoracic or lumbar spine, pelvis or lower extremities or coordination in kinematics between two or more joints/segments); 3) kinetic data (net joint moments, joint impulse, work, power); 4) ground reaction force data (vertical or horizontal ground reaction forces); 5) EMG (amplitude or timing of activation in the trunk or lower extremity musculature). Gait paradigms included overground and treadmill steady-state walking and running, as well as walking under dual task conditions involving additional mechanical or cognitive tasks. In studies that included pre- and post-intervention data, only the pre-intervention outcomes were included in this review. Studies were excluded if they were conference abstracts, case reports, dissertations, or review articles, if they did not report comparisons between individuals with and without LBP, or if LBP was experimentally induced in previously asymptomatic participants.

#### Study quality assessment

Quality of the reporting of the included studies, and the risk of bias, was assessed using a 16-criteria checklist[15–18] (Table 1). A positive score was given for each criterion met by the study. A total quality score was calculated as the sum of all positive scores from criteria 3 through 16 relevant to the study type (8, 12, and 9 for cross-sectional, case-control, and prospective cohort studies respectively) and a percentage of the possible maximum score was calculated. Each study was independently scored by two authors (JAS scored all studies, S-PL, JB and H-LT scored one third of the studies each). Where there was a difference in scores, the two scoring authors discussed the criteria where the scoring discrepancy occurred and reached a consensus on a final score. Studies were designated as having high reporting quality if they scored 50% or more[17].

#### Data extraction

The following data were extracted from all eligible studies: study design, sample size, study inclusion/exclusion criteria, study population demographic characteristics, any additional metrics characterizing the LBP cohort, and the biomechanical outcomes. Data were extracted and double checked by three authors (HS, VW, JAS).

Data were synthesized qualitatively if there were at least two studies/unique cohorts with equivalent outcomes. Data were pooled for meta-analysis for outcomes in which there were equivalent data available from more than three studies/unique cohorts. Where necessary, authors of studies that did not report group means/standard deviations were contacted to provide these data. Group averages/standard deviations were calculated from confidence intervals, standard errors, effect sizes and median/inter-quartile ranges as needed using standard methods. For the pooled analyses, group averages/standard deviations from LBP or male/female subgroups reported in some studies were combined[19]. A random effects model

was used to calculate standardized mean differences (SMD) and 95% confidence intervals between the LBP and back-healthy groups (Review Manager version 5.4.1)[20]. Effect sizes of  $> 0.8$  were considered large and  $> 0.5$  were considered moderate. The heterogeneity in the results within the pooled analyses was evaluated for each outcome using the chi-squared test to detect significant heterogeneity, and the  $I^2$  statistic to quantify the heterogeneity, with  $I^2$  greater than 0.75 indicative of substantial heterogeneity[21]. Studies were excluded from pooled data analyses if the 95% confidence interval for the group effect in that study did not overlap with the confidence interval for the SMD effect, and the removal of the outlier study did not affect the direction or significance of the pooled effect[21].

The level of evidence for the pooled analyses was defined using the following criteria[22,23]: 1) Strong evidence – homogenous data ( $\text{Chi}^2$  P value  $\geq 0.05$ ) pooled from studies of which at least two were high quality; 2) Moderate evidence – either heterogeneous data ( $\text{Chi}^2$  P value  $< 0.05$ ) pooled from studies of which one was high quality, or homogenous data ( $\text{Chi}^2$  P value  $\geq 0.05$ ) from lower quality studies; 3) Limited evidence – heterogeneous data ( $\text{Chi}^2$  P value  $< 0.05$ ) from lower quality studies[22,23].

## RESULTS

The initial search identified 3,272 articles (Figure 1). Following the removal of duplicates, 2,202 articles were available for further evaluation. An additional seven articles were identified manually and during the repeat search in 2020. The abstracts and titles of 2,209 articles were screened. Lastly, 124 full text articles were retrieved and assessed for inclusion. A total of 97 articles were included. Attempts were made to contact authors of 22 studies that did not present group data for one or more variables of interest, and responses were received for seven studies. Median score for reporting quality/risk of bias was 33% (range, 13 - 89%). Nineteen studies scored greater than 50%. Most studies did not report the participation rate and therefore the potential influence of non-response was unclear. Very few studies reported blinding of researchers or presented confidence intervals in their analyses.

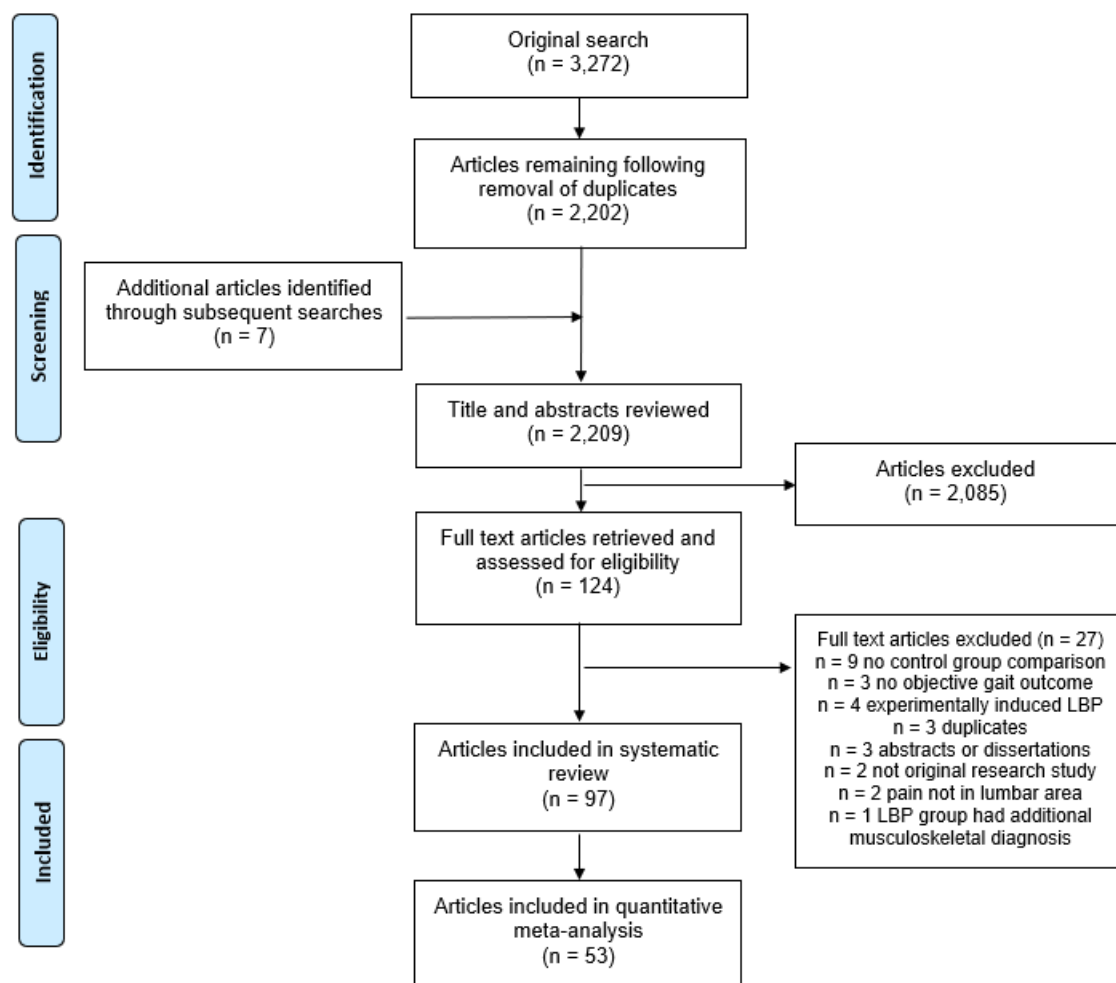

Figure 1. Flow diagram summarizing study selection processes.

### Participant numbers and demographics

Of the included articles, 93 were case-control, 3 were cross-sectional[24–26], and one was a prospective cohort study[27]. Eight studies involving four unique cohorts investigated running gait. Eighty-three studies contained unique sample groups, for a total of, 3,364 individuals with ongoing LBP and 2,315 back-healthy controls. Of the studies that reported participants' sex, the LBP group included 767 males and 2,075 females and the control group included 653 males and 961 females. The range of mean age for the LBP groups was 21.4 -73.6 years and 18.7-73.5 years for the control groups. Participants with LBP were described as having back pain, nonspecific or idiopathic LBP, chronic LBP, or recurrent LBP. However, as the criteria for these categories varied between studies, we did not attempt to sub-group participants based on these descriptors. The most common measure to define persistent LBP was duration of symptoms, with minimum duration varying from 6 weeks to 1 year, and the most frequent criterion being 3 months (Table 2). Two studies included participants described as having acute LBP, defined as

symptom duration of less than seven days, who were re-tested once symptoms had resolved[28,29]. Four studies sharing the same full or partial cohort included a separate group with a history of resolved LBP[30–33]. Nineteen studies quantified minimum or maximum pain severity as part of their inclusion criteria (Table 2). Seven studies required LBP to be severe enough to impact function[34–40]. Fourteen studies used pain frequency as a measure to define chronicity or recurrence of episodes[34–38,41–49]. Location of LBP was defined in 16 studies, with location predominantly described as occurring below the costal margin and above gluteal folds (Table 2).

Fourteen of the studies recruited subgroups of individuals with LBP based on pathoanatomical diagnoses. Among these articles, 32 participants were diagnosed with lumbar disc herniation[50–54]. One hundred and eight participants were described as having spinal stenosis[55–58]. Forty participants had LBP with pain referred to the lower limbs[59,60]. Thirty-nine participants were described as having radiculopathy[45,46]. Lastly, one article recruited a pain group with LBP diagnosed as stenosis, degenerative instability, or disc herniation[61]. For the control groups, most studies required controls to be healthy, pain-free individuals, and they were frequently matched by sex and age to the experimental group.

Exclusion criteria varied widely across studies. Eighty studies explicitly excluded participants whose LBP was associated with known pathoanatomical diagnoses such as radiculopathy or if participants had a history of spinal surgery.

#### Spatiotemporal characteristics

Thirty studies with a total of 1570 participants were included in the pooled analysis of preferred walking speed in individuals with persistent LBP. Moderate evidence with a moderate effect size indicated that individuals with LBP walked more slowly than back-healthy individuals (-0.59 [95% CI -0.77 to -0.42],  $I^2 = 58%$   $P < 0.001$ , test for overall effect  $P < 0.001$ , Figure 2). Two studies that quantified gait biomechanics across a range of controlled treadmill speeds noted that individuals with LBP were not able to maintain gait at controlled speeds of greater than approximately 1.4 m/s[62,63]. Pooled data with 687 participants indicated with strong evidence and a small effect size that individuals with LBP had shorter stride length when walking at preferred speed (-0.38 [-0.60 to -0.16],  $I^2 = 45%$   $P = 0.05$ , effect  $P < 0.001$ , Figure 2). Pooled evidence from 510 participants demonstrated a trend toward cadence also being reduced in individuals with LBP (-0.19 [-0.46 to 0.09],  $I^2 = 53%$   $P = 0.03$ , effect  $P = 0.18$ , Figure 2). There was moderate evidence from seven studies that duration of single limb support did not differ between groups (-0.17 [-0.56 to 0.23],  $I^2 = 72%$   $P = 0.001$ , effect  $P = 0.41$ )[44,64–68]. Five studies with a total of 385 participants reported step width, and pooled analysis showed no difference between groups, although there was a trend toward greater step width in the LBP groups, with moderate evidence (0.34 [-0.06 to 0.74],  $I^2 = 72%$   $P = 0.006$ , effect  $P = 0.10$ ) [39,44,48,67,69]. In studies investigating distance walked in five minutes, individuals with LBP walked significantly shorter distances than healthy controls[70,71]. In studies involving running, preferred running speed did not differ between groups[31,35,72].

Several studies investigated how the addition of a cognitive task influenced spatiotemporal gait characteristics[38,73–75]. In individuals with LBP, the dual task condition was associated with greater or the same stride-to-stride variability of stride length [73,75].

#### Kinematic characteristics - single segment/joint

Pooled analyses of five studies with 193 participants examining upper lumbar motion demonstrated with strong evidence that there was no significant difference in amplitude of motion in the axial plane in individuals with persistent LBP (0.07[-0.26 to 0.39],  $I^2 = 21\%$   $P = 0.28$ , effect  $P = 0.69$ )[40,41,47,63,76]. These studies modeled upper lumbar kinematics with markers fixated around the spinal levels of T12[41], L1[40,47], L2[63] and L3[40,76,77]. Frontal plane upper lumbar motion was pooled from six studies and also demonstrated strong evidence that there was no difference between LBP and control groups (-0.13 [-0.39 to 0.13],  $I^2 = 0\%$   $P = 0.95$ , effect  $P = 0.32$ )[40,41,47,63,76,77]. As few studies investigated sagittal plane lumbar motion, these data were not pooled, but no studies reported a significant difference between individuals with and without LBP[41,47,77].

Nine studies with 307 participants had axial plane data for the thorax that could be pooled[39,40,47,63,72,76,78–80]. These studies modeled upper trunk motion with markers fixated on the sternum[39,79], acromioclavicular joints[72], and/or the spinal levels of C7[39,72], T1[40,76], T3[63], and T6[47,80]. There was strong evidence of no difference between groups (-0.10 [-0.33 to 0.13],  $I^2 = 0\%$   $P = 0.56$ , effect  $P = 0.40$ , Figure 3). Strong evidence pooled from six studies demonstrated that frontal plane motion also did not differ between groups (-0.16 [-0.45 to 0.12],  $I^2 = 13\%$   $P = 0.33$ , effect  $P = 0.26$ )[39,40,47,63,76,78]. Of the studies investigating sagittal plane motion that could be pooled, there was moderate evidence for no significant difference between individuals with and without LBP (-0.54 [-1.30 to 0.22],  $I^2 = 0\%$   $P = 0.40$ , effect  $P = 0.17$ )[39,47,72,78]. Intra-subject stride-to-stride variability of lumbar or thoracic kinematic motion was reported in several studies, but without consistent methodological approach or findings[41,63,81]. During running, upper trunk motion in the axial plane was reported as being less in individuals with LBP[72] or the same[32,34] and there was no difference in sagittal[32,34,72] or frontal plane motion[32,34].



a. Preferred walking speed

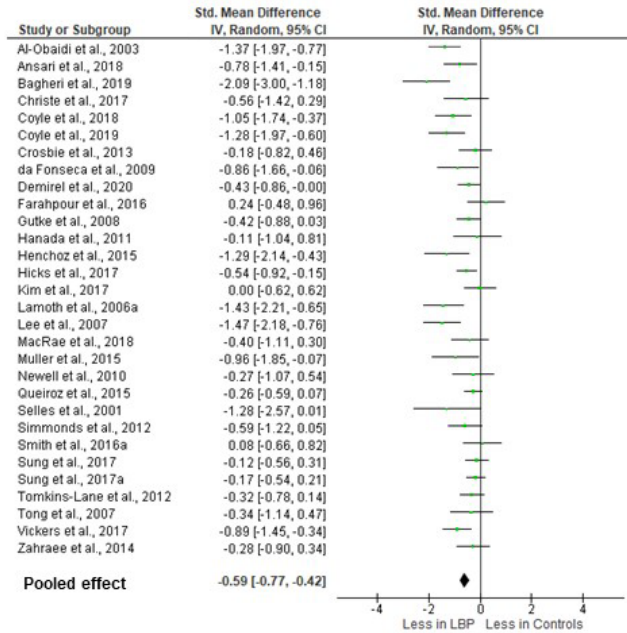

b. Stride length

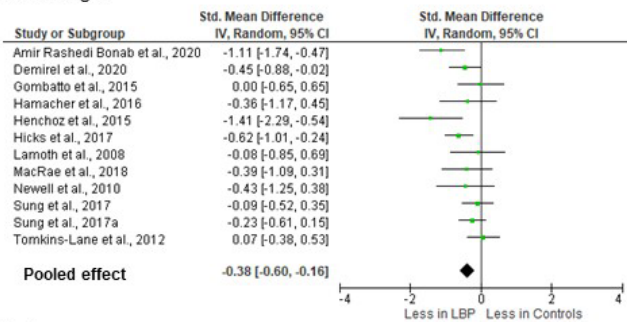

c. Cadence

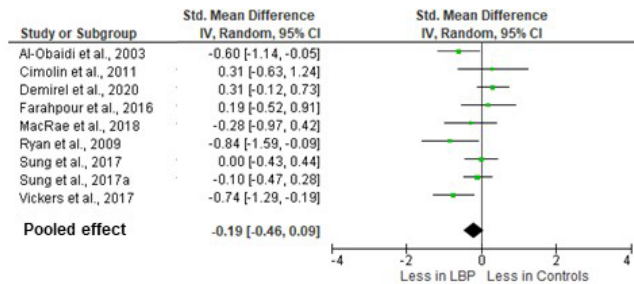

Figure 2. Meta-analysis of spatiotemporal gait variables. (2a) Preferred walking speed. (2b) Stride length. (2c) Cadence.

a. Amplitude of motion – thorax axial plane

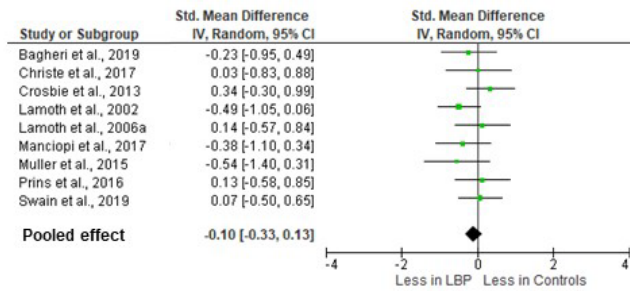

b. Inter-segmental coordination – axial plane

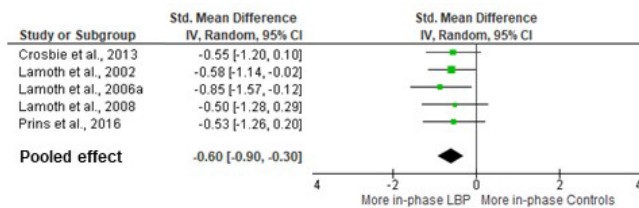

c. Amplitude of muscle activation – low lumbar paraspinals

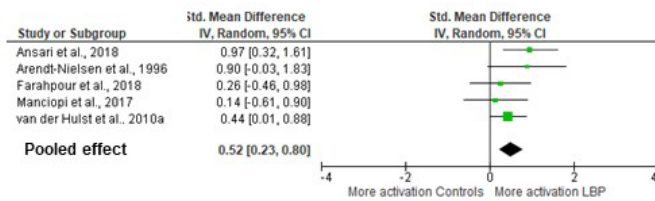

Figure 3. Meta-analysis of kinematic and EMG gait variables. (3a) Axial plane thoracic motion. (3b) Axial plane inter-segmental coordination. (3c) Amplitude of paraspinal activation.

The effect of performing a dual cognitive task at the same time as walking on the amplitude of lumbar or thoracic kinematics did not differ between groups[38], but did result in increased stride-to-stride variability of upper trunk motion in individuals with LBP[74].

Data from five studies with 179 participants investigating pelvis kinematics in the axial plane during walking were pooled[41,47,63,72,80]. The pelvis was modeled with markers on the sacrum[41,47,63,80] and greater trochanters[72]. Moderate evidence indicated no significant difference between groups (-0.12 [-0.42 to 0.18],  $I^2 = 50\%$   $P = 0.09$ , effect  $P = 0.43$ ). Similarly, in the frontal plane, there was strong evidence that the amplitude of pelvic motion did not differ between groups (-0.09 [-0.75 to 0.58],  $I^2 = 43\%$   $P = 0.15$ , effect  $P = 0.80$ )[41,47,63,82]. Sagittal plane pelvis kinematics were only available in two studies and neither reported a significant group difference[41,47]. During running, one study utilizing a controlled running speed found that axial plane pelvic motion was reduced in individuals with persistent LBP[72] and another using participant preferred running speed reported that it was greater in individuals with LBP[32].

Eight studies reported hip kinematics during steady-state gait[47,49,53,83–87]. Pooled data available from four of these studies with 128 participants indicated limited evidence for no difference in total sagittal plane hip motion in individuals with LBP (-0.08 [-0.43 to 0.27],  $I^2 = 0\%$   $P = 0.94$ , effect  $P = 0.65$ ). In the frontal plane, two studies reported reduced motion[84,85], with a large effect size occurring in a study of obese adults[85] and two reported no difference[53,83]. In the axial plane, two studies reported no difference[53,83] and one reported decreased motion in individuals with LBP[84]. Knee flexion during late stance or swing phase was reduced in three out of five studies that reported knee kinematics[72,83–85,87], but there were no consistent trends evident for frontal or axial plane knee motion, or for ankle motion. Two studies reported sagittal plane hip kinematics during running and found no difference in motion between individuals with and without LBP[30,35]. Similarly for running, sagittal plane knee motion either did not differ[34,72] or was reduced[30] in individuals with LBP and sagittal plane ankle motion was not significantly different[30,72].

#### Kinematic characteristics - inter-segmental coordination

Multiple studies investigated coordination of kinematic motion between spinal segments during steady-state gait[31,32,47,63,75,79,80,88–91]. Most examined coordination in motion between the thorax and pelvis across a variety of controlled walking speeds. Time- and frequency-domain techniques were used to quantify phase relations between segments. In the axial plane, pooled analyses of 185 participants demonstrated with strong evidence and a moderate effect size that motion between the thoracic spine and the lumbar spine/pelvis was significantly more in-phase in individuals with LBP than controls (-0.60 [-0.90 to -0.30],  $I^2 = 0\%$   $P = 0.96$ , effect  $P < 0.001$ , Figure 3). This finding was supported by three out of four additional studies from which data could not be pooled[31,88,89,91]. Multiple studies also investigated the stride-to-stride variability of inter-segmental coordination in the axial plane during steady-state gait[31,63,75,88,90,91], with three reporting less variability in individuals with LBP[88,90,91].

Fewer studies reported frontal or sagittal plane intersegmental coordination and there was insufficient data available to pool the findings. In the frontal plane, coordination between the thorax and lumbar spine/pelvis was reported as being more in-phase in individuals with LBP[31,32,47] or the same[63]. In the sagittal plane, one study reported more in-phase coordination in individuals with LBP[92] and two others sharing the same cohort reported no

difference [31,32]. Stride-to-stride variability in sagittal thorax-pelvis coordination was reported as being less in individuals with LBP[92] or the same[31].

#### Kinetic characteristics

Five studies reported kinetic measures in the lower extremities during walking[83,85,86,93,94]. In three studies examining sagittal plane total net joint moments at the hip, there were no differences between individuals with and without LBP[83,86,93]. During running, sagittal plane hip moments did not differ between groups[30,35]. One running study reported increased external flexion moment at the knee in individuals with LBP[35] but there was no difference in another study[30].

#### Ground reaction forces

Five studies with 138 participants investigated ground reaction forces during gait[43,59,62,65,94]. Limited evidence from pooled data with high heterogeneity suggested that there was no difference between groups in peak vertical ground reaction forces during either the first (0.29 [-0.54 to 1.11],  $I^2 = 82\%$   $P < 0.001$ , effect  $P = 0.49$ ) or second vertical force peaks (-0.21[-0.86 to 0.46],  $I^2 = 72\%$   $P = 0.01$ , effect  $P = 0.56$ ).

#### Muscle activation characteristics

Fifteen studies included EMG measures of the paraspinal and abdominal musculature during walking, using preferred and controlled walking speeds[36,39,49,61,63,83,90,95–102]. Of these, fourteen used surface EMG electrodes and one used intramuscular EMG. Most studies investigated amplitude of muscle activation, with two investigating timing of activation[36,49]. During steady-state gait, pooled analyses of data from 210 participants for surface EMG of the low lumbar paraspinal musculature across the entire stride cycle or within the stance phase indicated with moderate evidence and a moderate effect size that individuals with LBP had greater amplitude of activation (0.52 [0.23 to 0.80],  $I^2 = 1\%$   $P = 0.40$ , effect  $P < 0.001$ , Figure 3).

For the abdominal musculature, two high quality studies reported increased rectus abdominis activity during some or all phases of gait[95,98], one reported decreased activity[96] and two studies, including one high quality study, reported no difference in activity between groups[83,97]. Three studies reported no difference in amplitude of external oblique activation[83,97,98] and one high quality study reported increased activation during some subphases of gait[95]. One study reported increased peak activation in internal oblique compared with controls[83], one reported variable results depending on subphases of gait[96] and another reported decreased activity during several gait subphases[97].

## DISCUSSION

Individuals with persistent LBP walk differently than back-healthy controls. These differences are most evident in spatiotemporal characteristics, in patterns of inter-segmental coordination, and in paraspinal muscle activation. This is despite the fact that walking is often pain-relieving in individuals with acute or persistent LBP[28,63], and is often recommended as part of a rehabilitation program[11,103]. Current evidence does not indicate that LBP is associated with a difference in the amplitude of motion in the trunk or lower extremities during walking or running. To our knowledge this is the first comprehensive systematic review and meta-analysis of walking and running gait in individuals with LBP.

Pooled data demonstrated that individuals with persistent LBP choose to walk more slowly than individuals without back pain. In two studies that reported that LBP patients were unable to walk at controlled fast speeds[62,63], it was unclear if this inability was due to pain, fear of pain, or deconditioning. Al Obaidi et al.,[64] examined influences on preferred walking speed and found that fear avoidance and pain anticipation significantly predicted reduced walking speed in individuals with persistent LBP. It is possible that individuals with LBP use a strategy of slower walking velocity, reduced stride length, and decreased cadence to minimize the kinematic and kinetic demands of walking[28,59]. Unfortunately, as very few studies quantified spatiotemporal gait characteristics at controlled gait velocities, or adjusted for gait velocity in their analyses[48,63,77], there is insufficient evidence to separate the influence of slower gait velocity from the independent effects of LBP on these characteristics. Clinically it may be important to assess gait at a range of speeds in individuals with LBP to identify mechanisms underlying reduced speed and impaired stride length and cadence.

This study found strong evidence for altered phase relations between motion in the thorax and the pelvis during walking in individuals with persistent LBP. In back-healthy controls, the pattern of coordination, or relative motion, between the upper trunk and pelvis in the axial plane is speed dependent, becoming more anti-phase as speed increases[63]. Even when walking at controlled speeds, individuals with LBP exhibited greater in-phase movement patterns. This may be due to reduced ability to dissociate movement between the trunk and pelvis in these individuals. As anti-phase coordination during fast walking helps to generate elastic recoil between the thorax and the pelvis and may also contribute to minimizing total body angular momentum in the axial plane[104], the reduction in anti-phase coordination in individuals with LBP may contribute to decreased gait speed and reduced stride length.

Our meta-analysis demonstrates that individuals with LBP have greater lumbar paraspinal activation during walking. Phasic muscle activity in the paraspinals occurs bilaterally at initial contact and during the double support phases of the gait cycle[105,106]. This activation controls sagittal and frontal plane motion between the trunk and the pelvis[107]. The amplitude of this activity is low, typically less than 20% of maximum voluntary activation for walking[36,108] although this increases to up to 100% of maximum for fast running[108]. Acutely, increased activation during gait may be adaptive if it serves to reduce motion and protect pain-sensitive tissues. After the acute phase, it may also be a compensation for the muscle weakness related to atrophy and fatty infiltration that occurs in multifidus in response to back pain[109] or for proprioceptive dysfunction[110,111]. However, over time this increased activation in individuals with LBP may contribute to recurrence due to increased compressive spinal loading[112]. Increased paraspinal activation may also result in increased axial stiffness between the upper trunk and the pelvis, partially explaining the reduced trunk/pelvis dissociation described above[88,104].

In comparison with the paraspinals, abdominal muscle activity during locomotion is much more variable between individuals and more dependent upon locomotor speed[105,107,108]. This variability within healthy individuals is perhaps due to the redundancy of the abdominal muscle system and likely accounts for the lack of consistent differences in abdominal activation in individuals with LBP in the present review. It should be noted that all but one of the studies in this review used surface EMG. Surface EMG cannot selectively quantify activation in the transversus abdominis and multifidus muscles[113,114]. Isolated postural impairment of these deep muscles has been a focus of LBP research and treatment for some years. However, our

findings are consistent with a recent systematic review of anticipatory postural adjustments indicating that the postural function of the superficial muscles in the abdominal and paraspinal systems are also affected by LBP[115].

Current evidence does not consistently demonstrate a significant difference in joint or segmental excursion in the trunk or lower extremities during walking or running in individuals with LBP. For the thoracic and lumbar spines, joint range of motion utilized during walking and slow running is a small proportion of the available range[108]. This is in contrast with other activities such as standing forward flexion where significant reductions in lumbar range of motion in individuals with LBP have been observed[116]. The amplitude of hip and knee motion during walking and running is a greater proportion of available range, but the current evidence does not consistently support interdependency between back pain and lower limb gait kinematics.

### Limitations

The limited number of available studies that investigate running precluded meta-analyses of the running biomechanics in individuals with LBP. As noted earlier, many studies quantified walking biomechanics at participants' preferred walking speeds. This makes it difficult to determine if the observed impairments in characteristics like stride length in individuals with LBP are evident even when walking speed is controlled. Additionally, in this review we were unable to probe differences in gait between sub-groups of individuals with LBP. The inconsistent sub-grouping or classification of individuals with persistent LBP remains problematic. Multiple classification systems based on biomechanical or kinesiopathological factors have been proposed, but none are fully supported by available evidence[117]. Several studies in this review recruited participants based on pathoanatomical diagnoses such as herniated lumbar discs, degenerative instability, or spinal stenosis. Studies varied in how these pathoanatomical diagnoses were made, and it is now widely recognized that pathoanatomical findings do not adequately inform clinical presentation or outcome[118]. Some studies investigated patient sub-groupings based on age, sex, weight, pain severity, or psychosocial factors. However, the heterogeneity of the participants included in this review results in greater generalizability of the findings to the broader clinical population.

### CONCLUSION

We found that individuals with LBP exhibit different biomechanical characteristics during gait than back-healthy controls. Differences are most evident in spatiotemporal characteristics, thorax/pelvis coordination, and paraspinal muscle activation. However, it is not known if the strategies evident in individuals with LBP during gait are adaptive or maladaptive. Prospective research following the transition from acute to persistent pain or symptom resolution will provide insight into the effect of these altered gait mechanics on the trajectory of back pain symptoms over time.

## Acknowledgements

The authors would like to thank Ivan Portillo MLIS AHIP for his assistance in refining the search strategy and search terms.

Table 1. Checklist for assessment methodological quality for cross sectional (CS), case-control (CC) and prospective cohort (PC) study designs.

| Domain                                            | Item # | Description                                                                                                                                                                                                                | CS       | CC        | PC       |
|---------------------------------------------------|--------|----------------------------------------------------------------------------------------------------------------------------------------------------------------------------------------------------------------------------|----------|-----------|----------|
| Study objective                                   | 1      | Positive, if the study had a clearly defined objective                                                                                                                                                                     | +        | +         | +        |
| Study population                                  | 2      | Positive, if the main features of the study population are described (sampling frame and distribution of the population according to age and sex)                                                                          | +        | +         | +        |
|                                                   | 3      | Positive, if cases and controls are drawn from the same population and a clear definition of cases and controls is given and if subjects with the disease/symptom in the past 3 months are excluded from the control group |          | +         |          |
|                                                   | 4      | Positive, if the participation rate is at least 80% or if the participation rate is 60–80% and the non-response is not selective (data shown)                                                                              | +        | +         | +        |
|                                                   | 5      | Positive, if the participation rate at main moment of follow-up is at least 80% or if the non-response is not selective (data shown)                                                                                       |          |           | +        |
| Measurements                                      | 6      | Positive, if data on history of the disease/symptom is collected and included in the statistical analysis                                                                                                                  | +        | +         | +        |
|                                                   | 7      | Positive, if the outcome is measured in an identical manner among cases and controls                                                                                                                                       |          | +         |          |
|                                                   | 8      | Positive, if the outcome assessment is blinded with respect to disease status                                                                                                                                              | +        | +         |          |
|                                                   | 9      | Positive, if the outcome is assessed at a time before the occurrence of the disease/symptom                                                                                                                                |          | +         |          |
| Assessment of the outcome                         | 10     | Positive, if the time-period on which the assessment of disease/symptom was based was at least 1 year                                                                                                                      |          |           | +        |
|                                                   | 11     | Method for assessing injury status: physical examination blinded to exposure status (+); self-reported: specific questions relating to symptoms/disease/use of manikin (+), single question (–)                            | +        | +         | +        |
|                                                   | 12     | Positive, if incident cases were included (prospective enrolment)                                                                                                                                                          |          | +         |          |
| Analysis and data presentation                    | 13     | Positive, if the measures of association or group comparisons estimated were presented including confidence intervals                                                                                                      | +        | +         | +        |
|                                                   | 14     | Positive, if the analysis is controlled for confounding or effect modification: individual factors                                                                                                                         | +        | +         | +        |
|                                                   | 15     | Positive, if the analysis is controlled for confounding or effect modification: other factors                                                                                                                              | +        | +         | +        |
|                                                   | 16     | Positive, if the number of cases in the final multivariate model was at least 10 times the number of independent variables in the analysis                                                                                 | +        | +         | +        |
| <b>Total possible score (sum of items 3 – 16)</b> |        |                                                                                                                                                                                                                            | <b>8</b> | <b>12</b> | <b>9</b> |



Table 2. Summary of included studies

| Author, year                        | Sample size                    | LBP symptom inclusion criteria                                                                                                                                | High quality score |
|-------------------------------------|--------------------------------|---------------------------------------------------------------------------------------------------------------------------------------------------------------|--------------------|
| Al-Obaidi et al., 2003[64]          | 31 LBP<br>24 Control           | <ul style="list-style-type: none"> <li>• Duration &gt; 7 weeks</li> </ul>                                                                                     | +                  |
| Amir Rashedi Bonab et al., 2020[50] | 50 LBP<br>20 Control           | <ul style="list-style-type: none"> <li>• Physician diagnosis of lumbar disc herniation or chronic LBP</li> <li>• Symptoms within past 3 months</li> </ul>     |                    |
| Ansari et al., 2018[100]            | 21 LBP<br>21 Control           | <ul style="list-style-type: none"> <li>• Duration &gt; 3 months</li> <li>• Intensity &lt; 6/10</li> </ul>                                                     |                    |
| Anukoolkarn et al., 2015[119]       | 40 LBP<br>40 Control           | <ul style="list-style-type: none"> <li>• Duration &gt; 3 months</li> </ul>                                                                                    |                    |
| Arendt-Nielsen et al., 1996[101]    | 10 LBP<br>10 Control           | <ul style="list-style-type: none"> <li>• Diagnosis of idiopathic LBP</li> <li>• Intensity &gt; 3/10</li> </ul>                                                |                    |
| Bagheri et al., 2019[78]            | 15 LBP<br>15 Control           | <ul style="list-style-type: none"> <li>• Duration &gt; 3 months</li> </ul>                                                                                    |                    |
| Bagheri et al., 2020[81]            | 15 LBP<br>15 Control           | <ul style="list-style-type: none"> <li>• Duration &gt; 3 months</li> </ul>                                                                                    | +                  |
| Becker et al., 2018[61]             | 30 LBP<br>20 Control           | <ul style="list-style-type: none"> <li>• Diagnosis of stenosis, degenerative instability, or disc herniation with leg pain/neurogenic claudication</li> </ul> |                    |
| Carvalho et al., 2016[120]          | 9 LBP<br>9 Control             | <ul style="list-style-type: none"> <li>• Duration &gt; 3 months</li> </ul>                                                                                    |                    |
| Christe et al., 2017[76]            | 11 LBP<br>11 Control           | <ul style="list-style-type: none"> <li>• Duration &gt; 3 months</li> </ul>                                                                                    |                    |
| Cimolin et al., 2011                | 8 LBP<br>20 Control (10 obese) | <ul style="list-style-type: none"> <li>• Duration &gt; 3 months</li> </ul>                                                                                    |                    |
| Coyle et al., 2018[46]              | 19 LBP<br>19 Control           | <ul style="list-style-type: none"> <li>• Duration ≥ 3 months</li> <li>• Frequency ≥ 4 days/week</li> <li>• Intensity ≥ 3/10</li> </ul>                        | +                  |

|                             |                                          |                                                                                                                                                                                                                                             |   |
|-----------------------------|------------------------------------------|---------------------------------------------------------------------------------------------------------------------------------------------------------------------------------------------------------------------------------------------|---|
|                             |                                          | <ul style="list-style-type: none"> <li>• Pain radiation to/below knee when walking</li> </ul>                                                                                                                                               |   |
| Coyle et al., 2019[45]      | 20 LBP<br>20 Control                     | <ul style="list-style-type: none"> <li>• Duration <math>\geq</math> 3 months</li> <li>• Frequency <math>\geq</math> 4 days/week</li> <li>• Intensity <math>\geq</math> 3/10</li> <li>• Pain radiation to/below knee when walking</li> </ul> | + |
| Crosbie et al., 2013[47]    | 19 LBP<br>19 Control                     | <ul style="list-style-type: none"> <li>• Frequency <math>\geq</math> 2 recurrences after initial episode</li> <li>• Episode duration &gt; 24 hours</li> </ul>                                                                               |   |
| da Fonseca et al., 2009[62] | 17 LBP<br>11 Control                     | <ul style="list-style-type: none"> <li>• Duration &gt; 6 months</li> </ul>                                                                                                                                                                  |   |
| Demirel et al., 2020[121]   | 66 LBP<br>21 Control                     | <ul style="list-style-type: none"> <li>• Duration &gt; 3 months</li> <li>• Intensity &gt; 3/10</li> </ul>                                                                                                                                   | + |
| Ebrahimi et al., 2017[92]   | 10 LBP<br>10 Control                     | <ul style="list-style-type: none"> <li>• Duration &gt; 3 months</li> <li>• Intensity 4 – 6/10</li> <li>• Disability 21 – 60%</li> </ul>                                                                                                     |   |
| Farahpour et al., 2016[65]  | 15 LBP<br>30 Control (15 with pronation) | <ul style="list-style-type: none"> <li>• Intensity &gt;30/100</li> <li>• Disability index &gt; 10</li> </ul>                                                                                                                                |   |
| Farahpour et al., 2018[83]  | 15 LBP<br>30 Control (15 with pronation) | <ul style="list-style-type: none"> <li>• Intensity &gt;30/100</li> <li>• Disability index &gt; 10</li> </ul>                                                                                                                                |   |
| Gombatto et al., 2015[77]   | 18 LBP<br>18 Control                     | <ul style="list-style-type: none"> <li>• Diagnosis of LBP</li> </ul>                                                                                                                                                                        |   |
| Gutke et al., 2008[27]      | Prospective cohort of 308                | <ul style="list-style-type: none"> <li>• Diagnosis of LBP or pelvic pain based on clinical assessment</li> </ul>                                                                                                                            | + |
| Hamacher et al., 2014[74]   | 12 LBP<br>12 Control                     | <ul style="list-style-type: none"> <li>• Duration &gt; 3 months</li> </ul>                                                                                                                                                                  |   |
| Hamacher et al., 2016[73]   | 12 LBP<br>12 Control                     | <ul style="list-style-type: none"> <li>• Duration &gt; 3 months</li> <li>• Intensity <math>\geq</math> 4/10</li> </ul>                                                                                                                      |   |
| Hamacher et al., 2016a[122] | 14 LBP<br>14 Control                     | <ul style="list-style-type: none"> <li>• Duration &gt; 3 months</li> <li>• Intensity <math>\geq</math> 4/10</li> </ul>                                                                                                                      |   |

|                                     |                                                        |                                                                                                                                                                                           |   |
|-------------------------------------|--------------------------------------------------------|-------------------------------------------------------------------------------------------------------------------------------------------------------------------------------------------|---|
| Hamill et al., 2009[30]             | 11 LBP<br>22 Control (11 with history of resolved LBP) | <ul style="list-style-type: none"> <li>• Duration <math>\geq</math> 4 months</li> <li>•</li> </ul>                                                                                        |   |
| Hanada et al., 2011[96]             | 9 LBP<br>9 Control                                     | <ul style="list-style-type: none"> <li>• Duration &gt; 8 months</li> </ul>                                                                                                                |   |
| Hart et al., 2009[34]               | 25 LBP<br>25 Control                                   | <ul style="list-style-type: none"> <li>• Frequency <math>\geq</math> 3 episodes over 3 years, or 5 episodes in total</li> <li>• Limitation to daily activities during episodes</li> </ul> |   |
| Hart et al., 2009a[35]              | 25 LBP<br>25 Control                                   | <ul style="list-style-type: none"> <li>• Frequency <math>\geq</math> 3 episodes over 3 years, or 5 episodes in total</li> <li>• Limitation to daily activities during episodes</li> </ul> |   |
| Healey et al., 2005[123]            | 11 LBP<br>11 Control                                   | <ul style="list-style-type: none"> <li>• Duration &gt; 6 months</li> </ul>                                                                                                                |   |
| Hemmati et al., 2017[124]           | 40 LBP<br>40 Control                                   | <ul style="list-style-type: none"> <li>• Duration &gt; 3 months</li> <li>• Intensity 3 – 5/10</li> <li>• Intensity &lt; 3/10 at time of testing</li> </ul>                                |   |
| Henchoz et al., 2015[125]           | 13 LBP<br>13 Control                                   | <ul style="list-style-type: none"> <li>• Duration &gt; 3 months</li> </ul>                                                                                                                |   |
| Hicks et al., 2017[48]              | 54 LBP<br>54 Control                                   | <ul style="list-style-type: none"> <li>• Duration &gt; 3 months</li> <li>• Frequency <math>\geq</math> 4 days/week</li> <li>• Intensity <math>\geq</math> 3/10</li> </ul>                 | + |
| Hines et al., 2019[93]              | 25 LBP<br>27 Control                                   | <ul style="list-style-type: none"> <li>• Duration <math>\geq</math> 6 weeks</li> <li>• <math>\geq</math> 1 episode in week of testing</li> </ul>                                          |   |
| Huang et al., 2011[51]              | 12 LBP<br>12 Control                                   | <ul style="list-style-type: none"> <li>• Lumbar disc herniation on CT scan</li> </ul>                                                                                                     |   |
| Jimenez-del-Barrio et al., 2020[87] | 20 LBP<br>20 Control                                   | <ul style="list-style-type: none"> <li>• Duration <math>\geq</math> 3 months</li> <li>• Pain between costal margin and gluteal folds</li> </ul>                                           |   |
| Keefe et al., 1985[68]              | 18 LBP<br>18 Control                                   | <ul style="list-style-type: none"> <li>• Duration <math>\geq</math> 6 months</li> </ul>                                                                                                   | + |

|                          |                      |                                                                                                                                                                                            |   |
|--------------------------|----------------------|--------------------------------------------------------------------------------------------------------------------------------------------------------------------------------------------|---|
| Kendall et al., 2010[82] | 10 LBP<br>10 Control | <ul style="list-style-type: none"> <li>• Duration <math>\geq</math> 6 weeks</li> <li>• Intensity <math>\geq</math> 3/10</li> <li>• Pain between costal margin and gluteal folds</li> </ul> |   |
| Kim et al., 2015[126]    | 10 LBP<br>10 Control | <ul style="list-style-type: none"> <li>• Duration &gt; 2 months</li> <li>• Pain between inferior scapulae and cleft of buttocks</li> </ul>                                                 |   |
| Kim et al., 2017[97]     | 30 LBP<br>15 Control | <ul style="list-style-type: none"> <li>• Duration &gt; 7 weeks</li> <li>• Pain between costal margin and gluteal folds</li> </ul>                                                          | + |
| Kuai et al., 2017[53]    | 7 LBP<br>26 Control  | <ul style="list-style-type: none"> <li>• Diagnosis of lumbar disc herniation based on imaging and confirmed by 2 orthopaedic physicians</li> </ul>                                         |   |
| Kuai et al., 2017a[52]   | 7 LBP<br>26 Control  | <ul style="list-style-type: none"> <li>• Diagnosis of low lumbar disc herniation based on imaging and confirmed by 2 orthopaedic physicians</li> </ul>                                     |   |
| Kuai et al., 2018[54]    | 7 LBP<br>26 Control  | <ul style="list-style-type: none"> <li>• Diagnosis of low lumbar disc herniation awaiting surgery</li> </ul>                                                                               |   |
| Lamoth et al., 2002[127] | 39 LBP<br>19 Control | <ul style="list-style-type: none"> <li>• Duration &gt; 3 months</li> <li>• History of seeking medical treatment and physician diagnosis of nonspecific chronic LBP</li> </ul>              |   |
| Lamoth et al., 2006[90]  | 12 LBP<br>12 Control | <ul style="list-style-type: none"> <li>• Duration &gt; 3 months</li> <li>• History of seeking medical treatment and physician diagnosis of nonspecific LBP</li> </ul>                      |   |
| Lamoth et al., 2006a[63] | 22 LBP<br>17 Control | <ul style="list-style-type: none"> <li>• Duration &gt; 3 months</li> <li>• History of seeking medical treatment and physician diagnosis of nonspecific LBP</li> </ul>                      | + |
| Lamoth et al., 2008[75]  | 12 LBP<br>14 Control | <ul style="list-style-type: none"> <li>• Duration &gt; 3 months</li> </ul>                                                                                                                 |   |

|                            |                               |                                                                                                                                                                                                                                |   |
|----------------------------|-------------------------------|--------------------------------------------------------------------------------------------------------------------------------------------------------------------------------------------------------------------------------|---|
|                            |                               | <ul style="list-style-type: none"> <li>• History of seeking medical treatment and physician diagnosis of nonspecific LBP</li> </ul>                                                                                            |   |
| Lee et al., 2002[128]      | 40 LBP<br>48 Control          | <ul style="list-style-type: none"> <li>• Not specified</li> </ul>                                                                                                                                                              |   |
| Lee et al., 2007[59]       | 40 LBP<br>20 Control          | <ul style="list-style-type: none"> <li>• Current episode of LBP ± unilateral referred leg pain</li> <li>• Currently receiving medical treatment</li> </ul>                                                                     |   |
| Lee et al., 2011[129]      | 30 LBP<br>30 Control          | <ul style="list-style-type: none"> <li>• Duration ≥ 3 months</li> </ul>                                                                                                                                                        |   |
| MacRae et al., 2018[86]    | 16 LBP<br>16 Control          | <ul style="list-style-type: none"> <li>• Duration ≥ 3 months</li> </ul>                                                                                                                                                        |   |
| Manciopi et al., 2017[39]  | 15 LBP<br>15 Control          | <ul style="list-style-type: none"> <li>• Duration &gt; 12 months</li> <li>• ≥ 1 episode in previous 6 months</li> <li>• Pain between T12 and gluteal folds</li> <li>• Limitation to work or necessity for treatment</li> </ul> |   |
| Müller et al., 2015[72]    | 11 LBP<br>11 Control          | <ul style="list-style-type: none"> <li>• Physician diagnosis of chronic, nonspecific LBP</li> </ul>                                                                                                                            |   |
| Nadler et al., 2002[26]    | Cross-sectional cohort of 211 | <ul style="list-style-type: none"> <li>• LBP in the previous year requiring treatment</li> </ul>                                                                                                                               | + |
| Naliboff et al., 1985[130] | 68 LBP<br>35 Control          | <ul style="list-style-type: none"> <li>• Duration ≥ 6 months</li> </ul>                                                                                                                                                        |   |
| Newell et al., 2010[131]   | 12 LBP<br>12 Control          | <ul style="list-style-type: none"> <li>• Duration &gt; 6 weeks</li> <li>• Physician diagnosis of nonspecific LBP</li> </ul>                                                                                                    |   |
| Novy et al., 1999[71]      | 79 LBP<br>46 Control          | <ul style="list-style-type: none"> <li>• Not specified</li> </ul>                                                                                                                                                              |   |
| Pakzad et al., 2016[95]    | 30 LBP<br>15 Control          | <ul style="list-style-type: none"> <li>• Duration &gt; 3 months</li> <li>• Intensity &gt; 2/10</li> <li>• Disability &gt; 12%</li> </ul>                                                                                       | + |

|                                    |                                                               |                                                                                                                                                               |   |
|------------------------------------|---------------------------------------------------------------|---------------------------------------------------------------------------------------------------------------------------------------------------------------|---|
|                                    |                                                               | <ul style="list-style-type: none"> <li>• Pain between lower ribs and gluteal folds</li> </ul>                                                                 |   |
| Papadakis et al., 2009[55]         | 35 LBP<br>35 Control                                          | <ul style="list-style-type: none"> <li>• Diagnosis of stenosis based on imaging</li> </ul>                                                                    | + |
| Papi et al., 2019                  | 20 LBP<br>20 Control                                          | <ul style="list-style-type: none"> <li>• Nonspecific pain in the lower back</li> </ul>                                                                        |   |
| Poosapadi Arjunan et al., 2010[99] | 4 LBP<br>9 Control                                            | <ul style="list-style-type: none"> <li>• Duration between 6 weeks and 4 months</li> <li>• Mild to moderate intensity</li> </ul>                               |   |
| Prins et al., 2016[80]             | 15 LBP<br>15 Control                                          | <ul style="list-style-type: none"> <li>• History of chronic LBP with symptoms in the previous 3 months</li> <li>• Intensity <math>\geq 2/10</math></li> </ul> |   |
| Queiroz et al., 2015[132]          | 71 LBP<br>142 Control<br>(71 with other musculoskeletal pain) | <ul style="list-style-type: none"> <li>• Duration <math>\geq 6</math> weeks</li> </ul>                                                                        |   |
| Rahimi et al., 2020[84]            | 20 LBP<br>20 Control                                          | <ul style="list-style-type: none"> <li>• Duration &gt; 3 months</li> <li>• Physician diagnosis of nonspecific LBP</li> </ul>                                  |   |
| Rodrigues et al., 2017[133]        | 41 LBP<br>42 Control                                          | <ul style="list-style-type: none"> <li>• Duration &gt; 3 months</li> </ul>                                                                                    |   |
| Ryan et al., 2009[134]             | 15 LBP<br>15 Control                                          | <ul style="list-style-type: none"> <li>• Duration &gt; 3 months</li> </ul>                                                                                    |   |
| Seay et al., 2011[32]              | 14 LBP<br>28 Control (14 with history of resolved LBP)        | <ul style="list-style-type: none"> <li>• Duration <math>\geq 4</math> months</li> </ul>                                                                       |   |
| Seay et al., 2011a[31]             | 14 LBP<br>28 Control (14 with history of resolved LBP)        | <ul style="list-style-type: none"> <li>• Duration <math>\geq 4</math> months</li> </ul>                                                                       |   |
| Seay et al., 2014[33]              | 14 LBP                                                        | <ul style="list-style-type: none"> <li>• Duration <math>\geq 4</math> months</li> </ul>                                                                       |   |

|                            |                                              |                                                                                                                                                                                                                                                                                                                                   |
|----------------------------|----------------------------------------------|-----------------------------------------------------------------------------------------------------------------------------------------------------------------------------------------------------------------------------------------------------------------------------------------------------------------------------------|
|                            | 28 Control (14 with history of resolved LBP) | <ul style="list-style-type: none"> <li>• Intensity mild to moderate</li> </ul>                                                                                                                                                                                                                                                    |
| Selles et al., 2001[91]    | 6 LBP<br>6 Control                           | <ul style="list-style-type: none"> <li>• Duration <math>\geq</math> 1 year</li> </ul>                                                                                                                                                                                                                                             |
| Simmonds et al., 1997[135] | 23 LBP<br>23 Control                         | <ul style="list-style-type: none"> <li>• Not specified</li> </ul>                                                                                                                                                                                                                                                                 |
| Simmonds et al., 1998[136] | 44 LBP<br>48 Control                         | <ul style="list-style-type: none"> <li>• Not specified</li> </ul>                                                                                                                                                                                                                                                                 |
| Simmonds et al., 2012[60]  | 40 LBP<br>20 Control                         | <ul style="list-style-type: none"> <li>• Current episode of LBP <math>\pm</math> unilateral referred leg pain</li> <li>• Currently receiving medical treatment</li> </ul>                                                                                                                                                         |
| Smith et al., 2016[37]     | 14 LBP<br>14 Control                         | <ul style="list-style-type: none"> <li>• Duration &gt; 1 year</li> <li>• Frequency <math>\geq</math> 2 episodes in the previous year</li> <li>• Intensity &lt; 0.5/10 at time of testing</li> <li>• Limitation to function during episodes</li> <li>• Unilateral pain between the 12<sup>th</sup> rib and gluteal fold</li> </ul> |
| Smith et al, 2016a[36]     | 14 LBP<br>14 Control                         | <ul style="list-style-type: none"> <li>• Duration &gt; 1 year</li> <li>• Frequency <math>\geq</math> 2 episodes in the previous year</li> <li>• Intensity &lt; 0.5/10 at time of testing</li> <li>• Limitation to function during episodes</li> <li>• Unilateral pain between the 12<sup>th</sup> rib and gluteal fold</li> </ul> |
| Smith et al., 2017[38]     | 14 LBP<br>14 Control                         | <ul style="list-style-type: none"> <li>• Duration &gt; 1 year</li> <li>• Frequency <math>\geq</math> 2 episodes in the previous year &gt; 24 hours</li> <li>• Intensity &lt; 0.5/10 at time of testing</li> </ul>                                                                                                                 |

|                                          |                                |                                                                                                                                                                                                                      |   |
|------------------------------------------|--------------------------------|----------------------------------------------------------------------------------------------------------------------------------------------------------------------------------------------------------------------|---|
|                                          |                                | <ul style="list-style-type: none"> <li>• Limitation to function during episodes</li> <li>• Unilateral pain between the 12<sup>th</sup> rib and gluteal fold</li> </ul>                                               |   |
| Spengelink et al., 2002[137]             | 47 LBP<br>10 Control           | <ul style="list-style-type: none"> <li>• Duration ≥ 6 months</li> </ul>                                                                                                                                              |   |
| Sung et al., 2017[69]                    | 37 LBP<br>45 Control           | <ul style="list-style-type: none"> <li>• Recently recovered from episode of LBP</li> </ul>                                                                                                                           |   |
| Sung et al., 2017a[44]                   | 51 LBP<br>59 Control           | <ul style="list-style-type: none"> <li>• Frequency ≥ 1 year incidence of recurrence</li> <li>• Recently recovered from episode of LBP</li> </ul>                                                                     |   |
| Swain et al., 2019[40]                   | 26 LBP<br>21 Control           | <ul style="list-style-type: none"> <li>• ≥ 1 episode within the last 2 months</li> <li>• Limitation to dance practice during episode(s)</li> <li>• Pain between the 12<sup>th</sup> rib and gluteal folds</li> </ul> | + |
| Tagliaferri et al., 2019[24]             | Cross-sectional cohort of 1182 | <ul style="list-style-type: none"> <li>• Intensity ≥ 1/10 at time of testing</li> </ul>                                                                                                                              |   |
| Tanigawa et al., 2018[25]                | Cross-sectional cohort of 52   | <ul style="list-style-type: none"> <li>• Presence of pain in low back, pubic symphysis or sacroiliac joints</li> </ul>                                                                                               |   |
| Taylor et al., 2003[28]                  | 8 LBP<br>8 Control             | <ul style="list-style-type: none"> <li>• Duration &lt; 7 days</li> <li>• Pain in lumbar region ± radiation to upper leg</li> </ul>                                                                                   |   |
| Taylor et al., 2004[29]                  | 12 LBP<br>11 Control           | <ul style="list-style-type: none"> <li>• Duration &lt; 7 days</li> <li>• Pain in lumbar region ± radiation to upper leg</li> </ul>                                                                                   |   |
| Teixeira da Cunha-Filho et al., 2010[70] | 30 LBP<br>30 Control           | <ul style="list-style-type: none"> <li>• Duration &gt; 3 months</li> <li>• Patient seeking medical care</li> </ul>                                                                                                   | + |
| Tomkins-Lane et al., 2012[57]            | 94 LBP<br>32 Control           | <ul style="list-style-type: none"> <li>• Diagnosis of spinal stenosis or non-stenotic LBP based on clinical assessment ± imaging</li> </ul>                                                                          | + |



|                                  |                        |                                                                                                                                                                                                                               |   |
|----------------------------------|------------------------|-------------------------------------------------------------------------------------------------------------------------------------------------------------------------------------------------------------------------------|---|
| Tong et al., 2007[58]            | 36 LBP<br>12 Control   | <ul style="list-style-type: none"> <li>• Diagnosis of spinal stenosis or non-stenotic LBP based on clinical assessment ± imaging</li> </ul>                                                                                   | + |
| van den Hoorn et al., 2012[88]   | 13 LBP<br>12 Control   | <ul style="list-style-type: none"> <li>• Not specified</li> </ul>                                                                                                                                                             |   |
| van der Hulst et al., 2010[98]   | 63 LBP<br>33 Control   | <ul style="list-style-type: none"> <li>• Duration &gt; 3 months</li> <li>• Pain between scapulae and buttock clefts ± radiation to legs</li> </ul>                                                                            | + |
| van der Hulst et al., 2010a[102] | 63 LBP<br>33 Control   | <ul style="list-style-type: none"> <li>• Duration &gt; 3 months</li> <li>• Pain between scapulae and buttock clefts ± radiation to legs</li> </ul>                                                                            | + |
| Vickers et al., 2017[138]        | 25 LBP<br>30 Control   | <ul style="list-style-type: none"> <li>• Duration ≥ 6 months</li> </ul>                                                                                                                                                       |   |
| Vogt et al., 2001[41]            | 34 LBP<br>22 Control   | <ul style="list-style-type: none"> <li>• Frequency ≥ ½ days in past 12 months (single or multiple episodes)</li> <li>• Clinician diagnosis of idiopathic chronic LBP</li> <li>• Pain between T12 and gluteal folds</li> </ul> |   |
| Vogt et al., 2003[49]            | 17 LBP<br>16 Control   | <ul style="list-style-type: none"> <li>• Frequency ≥ ½ days in past 12 months (single or multiple episodes)</li> <li>• Physician diagnosis of idiopathic chronic LBP</li> <li>• Pain between T12 and gluteal folds</li> </ul> |   |
| Voloshin et al., 1982[139]       | 24 LBP<br>39 Control   | <ul style="list-style-type: none"> <li>• Not specified</li> </ul>                                                                                                                                                             |   |
| Weiner et al., 2006[42]          | 163 LBP<br>160 Control | <ul style="list-style-type: none"> <li>• Duration ≥ 3 months</li> <li>• Frequency daily or almost every day</li> <li>• Intensity ≥ moderate</li> </ul>                                                                        |   |
| Yamakawa et al., 2004[56]        | 60 LBP<br>22 Control   | <ul style="list-style-type: none"> <li>• Diagnosis of spinal stenosis based on imaging</li> <li>• Criteria for non-stenotic LBP not specified</li> </ul>                                                                      |   |
| Yazdani et al., 2018[94]         | 11 LBP                 | <ul style="list-style-type: none"> <li>• Duration ≥ 6 months</li> </ul>                                                                                                                                                       |   |

|                          |            |                                                                                                                                                                                                                   |
|--------------------------|------------|-------------------------------------------------------------------------------------------------------------------------------------------------------------------------------------------------------------------|
|                          | 13 Control | <ul style="list-style-type: none"><li>• Physician diagnosis of idiopathic chronic LBP</li></ul>                                                                                                                   |
| Zahraee et al., 2014[43] | 20 LBP     | <ul style="list-style-type: none"><li>• Duration <math>\geq</math> 6 months</li></ul>                                                                                                                             |
|                          | 20 Control | <ul style="list-style-type: none"><li>• Frequency on most days per week</li><li>• Intensity <math>&gt;</math> 2/10</li><li>• Pain between T12 and gluteal folds</li><li>• Mechanically induced symptoms</li></ul> |

- 1 Rubin DI. Epidemiology and Risk Factors for Spine Pain. *Neurol Clin* 2007;**25**:353–71. doi:10.1016/j.ncl.2007.01.004
- 2 Henschke N, Maher CG, Refshauge KM, *et al.* Prognosis in patients with recent onset low back pain in Australian primary care: Inception cohort study. *BMJ* 2008;**337**:154–7. doi:10.1136/bmj.a171
- 3 Wasiak R, Kim J, Pransky G. Work disability and costs caused by recurrence of low back pain: longer and more costly than in first episodes. *Spine (Phila Pa 1976)* 2006;**31**:219–25. doi:10.1097/01.brs.0000194774.85971.df
- 4 da Silva T, Mills K, Brown BT, *et al.* Risk of Recurrence of Low Back Pain: A Systematic Review. *J Orthop Sport Phys Ther* 2017;**47**:305–13. doi:10.2519/jospt.2017.7415
- 5 Deyo RA, Dworkin S, Amtmann D, *et al.* Report of the NIH task force on research standards for chronic low back pain. *J Pain* 2014;**15**:569–85. doi:10.1002/nbm.3066.Non-invasive
- 6 Stanton TR, Latimer J, Maher CG, *et al.* How do we define the condition ‘recurrent low back pain’? A systematic review. *Eur Spine J* 2010;**19**:533–9. doi:10.1007/s00586-009-1214-3
- 7 Pincus T, Santos R, Breen A, *et al.* A review and proposal for a core set of factors for prospective cohorts in low back pain: A consensus statement. *Arthritis Care Res* 2008;**59**:14–24. doi:10.1002/art.23251
- 8 Norton G, McDonough CM, Cabral HJ, *et al.* Classification of patients with incident non-specific low back pain: implications for research. *Spine J* 2016;**16**:567–76. doi:10.1016/j.spinee.2015.08.015
- 9 Schache AG, Bennell KL, Blanch PD, *et al.* The coordinated movement of the lumbo – pelvic – hip complex during running : a literature review. *Gait Posture* 1999;**10**:30–47.
- 10 Rozumalski A, Schwartz MH, Wervey R, *et al.* The in vivo three-dimensional motion of the human lumbar spine during gait. *Gait Posture* 2008;**28**:378–84. doi:10.1016/j.gaitpost.2008.05.005
- 11 Callaghan JP, Patla AE, McGill SM. Low back three-dimensional joint forces, kinematics, and kinetics during walking. *Clin Biomech* 1999;**14**:203–16. doi:10.1016/S0268-0033(98)00069-2
- 12 van Dieën JH, Reeves NP, Kawchuk G, *et al.* Motor Control Changes in Low-Back Pain: Divergence in Presentations and Mechanisms. *J Orthop Sport Phys Ther* 2018;**49**:1–24. doi:10.2519/jospt.2019.7917
- 13 Koch C, Hänsel F. Chronic non-specific low back pain and motor control during gait. *Front Psychol* 2018;**9**:1–8. doi:10.3389/fpsyg.2018.02236
- 14 Ghamkhar L, Kahlaee AH. Trunk muscles activation pattern during walking in subjects with and without chronic low back pain: a systematic review. *PM R* 2015;**7**:519–26. doi:10.1016/j.pmrj.2015.01.013
- 15 Hamstra-Wright KL, Huxel Bliven KC, Bay C. Risk factors for medial tibial stress syndrome in physically active individuals such as runners and military personnel: a systematic review and meta-analysis. *Br J Sports Med* 2015;**49**:362–9. doi:10.1136/bjsports-2013-093262

- 16 van der Windt DAWM, Thomas E, Pope DP, *et al.* Occupational risk factors for shoulder pain : a systematic review. *Occup Environ Med* 2000;:433–42.
- 17 van der Worp H, van Ark M, Roerink S, *et al.* Risk factors for patellar tendinopathy: a systematic review of the literature. *Br J Sports Med* 2011;**45**:446–52. doi:10.1136/bjsm.2011.084079
- 18 Smith JA, Hawkins A, Grant-Beuttler M, *et al.* Risk Factors Associated With Low Back Pain in Golfers: A Systematic Review and Meta-analysis. *Sports Health* 2018;**10**:538–46. doi:10.1177/1941738118795425
- 19 Higgins JPT, Green S. *Cochrane Handbook for Systematic Reviews of Interventions*. John Wiley & Sons, Inc. 2011.
- 20 van Tulder M, Furlan A, Bombardier C, *et al.* Updated Method Guidelines for Systematic Reviews in the Cochrane Collaboration Back Review Group. *Spine (Phila Pa 1976)* 2003;**28**:1290–9. doi:10.1097/01.brs.0000065484.95996.af
- 21 Guyatt GH, Oxman AD, Kunz R, *et al.* GRADE guidelines: 7. Rating the quality of evidence - Inconsistency. *J Clin Epidemiol* 2011;**64**:1294–302. doi:10.1016/j.jclinepi.2011.03.017
- 22 Furlan AD, Pennick V, Bombardier C, *et al.* 2009 Updated Method Guidelines for Systematic Reviews in the Cochrane Back Review Group. *Spine (Phila Pa 1976)* 2009;**34**:1929–41. doi:10.1097/BRS.0b013e3181b1c99f
- 23 King MG, Lawrenson PR, Semciw AI, *et al.* Lower limb biomechanics in femoroacetabular impingement syndrome: A systematic review and meta-analysis. *Br J Sports Med* 2018;**52**:566–80. doi:10.1136/bjsports-2017-097839
- 24 Tagliaferri SD, Armbrecht G, Miller CT, *et al.* Testing the deconditioning hypothesis of low back pain: A study in 1182 older women. *Eur J Sport Sci* 2019;:1–7. doi:10.1080/17461391.2019.1606942
- 25 Tanigawa A, Morino S, Aoyama T, *et al.* Gait analysis of pregnant patients with lumbopelvic pain using inertial sensor. *Gait Posture* 2018;**65**:176–81. doi:10.1016/j.gaitpost.2018.07.165
- 26 Nadler SF, Moley P, Malanga GA, *et al.* Functional deficits in athletes with a history of low back pain: a pilot study. *Arch Phys Med Rehabil* 2002;**83**:1753–8. doi:10.1053/apmr.2002.35659
- 27 Gutke A, Östgaard HC, Öberg B. Association between muscle function and low back pain in relation to pregnancy. *J Rehabil Med* 2008;**40**:304–11. doi:10.2340/16501977-0170
- 28 Taylor NF, Evans OM, Goldie PA. The effect of walking faster on people with acute low back pain. *Eur Spine J* 2003;**12**:166–72. doi:10.1007/s00586-002-0498-3
- 29 Taylor N, Goldie P, Evans O. Movements of the pelvis and lumbar spine during walking in people with acute low back pain. *Physiother Res Int* 2004;**9**:74–84.
- 30 Hamill J, Moses M, Seay J. Lower extremity joint stiffness in runners with low back pain. *Res Sport Med* 2009;**17**:260–73. doi:10.1080/15438620903352057
- 31 Seay JF, Van Emmerik REA, Hamill J. Low back pain status affects pelvis-trunk coordination and variability during walking and running. *Clin Biomech* 2011;**26**:572–8.

- doi:10.1016/j.clinbiomech.2010.11.012
- 32 Seay JF, Van Emmerik REAA, Hamill J. Influence of low back pain status on pelvis-trunk coordination during walking and running. *Spine (Phila Pa 1976)* 2011;**36**:E1070–9. doi:10.1097/BRS.0b013e3182015f7c
- 33 Seay JF, Van Emmerik REAA, Hamill J. Trunk bend and twist coordination is affected by low back pain status during running. *Eur J Sport Sci* 2014;**14**:563–8. doi:10.1080/17461391.2013.866167
- 34 Hart JM, Kerrigan DC, Fritz JM, *et al.* Jogging kinematics after lumbar paraspinal muscle fatigue. *J Athl Train* 2009;**44**:475–81. doi:10.4085/1062-6050-44.5.475
- 35 Hart JM, Kerrigan DC, Fritz JM, *et al.* Jogging gait kinetics following fatiguing lumbar paraspinal exercise. *J Electromyogr Kinesiol* 2009;**19**:e458-64. doi:10.1016/j.jelekin.2008.09.003
- 36 Smith JA, Kulig K. Altered multifidus recruitment during walking in young asymptomatic individuals with a history of low back pain. *J Orthop Sports Phys Ther* 2016;**46**:365–74. doi:10.2519/jospt.2016.6230
- 37 Smith JA, Kulig KK. Trunk-pelvis coordination during turning: A cross sectional study of young adults with and without a history of low back pain. *Clin Biomech* 2016;**36**:58–64. doi:10.1016/j.clinbiomech.2016.05.011
- 38 Smith JA, Gordon J, Kulig K. The influence of divided attention on walking turns: Effects on gait control in young adults with and without a history of low back pain. *Gait Posture* 2017;**58**:498–503. doi:10.1016/j.gaitpost.2017.09.019
- 39 Manciola PAR, Rinaldi NM, Moraes R. Prehension combined with gait in individuals with chronic low back pain. *Motor Control* 2017;**21**:90–111. doi:10.1123/mc.2014-0044
- 40 Swain CT V, Bradshaw EJ, Ekegren CL, *et al.* Multi-segment spine range of motion in dancers with and without recent low back pain. *Gait Posture* 2019;**70**:53–8.
- 41 Vogt L, Pfeifer K, Portscher M, *et al.* Influences of Nonspecific Low Back Pain on Three-Dimensional Lumbar Spine Kinematics in Locomotion. *Spine (Phila Pa 1976)* 2001;**26**:1910–9. doi:10.1097/00007632-200109010-00019
- 42 Weiner DK, Rudy TE, Morrow L, *et al.* The relationship between pain, neuropsychological performance, and physical function in community-dwelling older adults with chronic low back pain. *Pain Med* 2006;**7**:60–70. doi:10.1111/j.1526-4637.2006.00091.x
- 43 Zahraee MH, Karimi MT, Mostamand J, *et al.* Analysis of asymmetry of the forces applied on the lower limb in subjects with nonspecific chronic low back pain. *Biomed Res Int* 2014;**2014**:289491. doi:10.1155/2014/289491
- 44 Sung PS, Zippel JT, Danial P. Gender differences in asymmetrical limb support patterns between subjects with and without recurrent low back pain. *Hum Mov Sci* 2017;**52**:36–44. doi:10.1016/j.humov.2017.01.002
- 45 Coyle PC, Pugliese JM, Sions JM, *et al.* Pain Provocation and the Energy Cost of Walking: A Matched Comparison Study of Older Adults With and Without Chronic Low Back Pain With Radiculopathy. *J Geriatr Phys Ther* Published Online First: 15 April 2019. doi:10.1519/JPT.0000000000000212

- 46 Coyle PC, Pugliese JM, Sions JM, *et al.* Energy Impairments in Older Adults With Low Back Pain and Radiculopathy: A Matched Case-Control Study. *Arch Phys Med Rehabil* 2018;**99**:2251–6. doi:10.1016/j.apmr.2018.03.016
- 47 Crosbie J, de Faria Negrão Filho R, Nascimento DP, *et al.* Coordination of Spinal Motion in the Transverse and Frontal Planes During Walking in People With and Without Recurrent Low Back Pain. *Spine (Phila Pa 1976)* 2013;**38**:E286–92. doi:10.1097/BRS.0b013e318281de28
- 48 Hicks GE, Sions JM, Coyle PC, *et al.* Altered spatiotemporal characteristics of gait in older adults with chronic low back pain. *Gait Posture* 2017;**55**:172–6. doi:10.1016/j.gaitpost.2017.04.027
- 49 Vogt L, Pfeifer K, Banzer W. Neuromuscular control of walking with chronic low-back pain. *Man Ther* 2003;**8**:21–8. doi:10.1054/math.2002.0476
- 50 Amir Rashedi Bonab M, Kuru Colak T, Toktas ZO, *et al.* Assessment of spatiotemporal gait parameters in patients with lumbar disc herniation and patients with chronic mechanical low back pain. *Turk Neurosurg* 2020;**30**:277–84. doi:10.5137/1019-5149.JTN.27499-19.2
- 51 Huang YP, Bruijn SM, Lin JH, *et al.* Gait adaptations in low back pain patients with lumbar disc herniation: Trunk coordination and arm swing. *Eur Spine J* 2011;**20**:491–9. doi:10.1007/s00586-010-1639-8
- 52 Kuai S, Liao Z, Zhou W, *et al.* The Effect of Lumbar Disc Herniation on Musculoskeletal Loadings in the Spinal Region During Level Walking and Stair Climbing. *Med Sci Monit* 2017;**23**:3869–77. doi:10.12659/msm.903349
- 53 Kuai S, Zhou W, Liao Z, *et al.* Influences of lumbar disc herniation on the kinematics in multi-segmental spine, pelvis, and lower extremities during five activities of daily living. *BMC Musculoskelet Disord* 2017;**18**:216. doi:10.1186/s12891-017-1572-7
- 54 Kuai S, Guan X, Zhou W, *et al.* Continuous lumbar spine rhythms during level walking, stair climbing and trunk flexion in people with and without lumbar disc herniation. *Gait Posture* 2018;**63**:296–301. doi:10.1016/j.gaitpost.2018.05.006
- 55 Papadakis NC, Christakis DG, Tzagarakis GN, *et al.* Gait variability measurements in lumbar spinal stenosis patients: Part A. Comparison with healthy subjects. *Physiol Meas* 2009;**30**:1171–86. doi:10.1088/0967-3334/30/11/003
- 56 Yamakawa K, Tsai CK, Haig AJ, *et al.* Relationship between ambulation and obesity in older persons with and without low back pain. *Int J Obes Relat Metab Disord* 2004;**28**:137–43. doi:10.1038/sj.ijo.0802478
- 57 Tomkins-Lane CC, Holz SC, Yamakawa KS, *et al.* Predictors of walking performance and walking capacity in people with lumbar spinal stenosis, low back pain and asymptomatic controls. *Arch Phys Med Rehabil* 2012;**93**:647–53. doi:10.1038/jid.2014.371
- 58 Tong HC, Haig AJ, Geisser ME, *et al.* Comparing pain severity and functional status of older adults without spinal symptoms, with lumbar spinal stenosis, and with axial low back pain. *Gerontology* 2007;**53**:111–5. doi:10.1159/000096861
- 59 Lee CE, Simmonds MJ, Etnyre BR, *et al.* Influence of Pain Distribution on Gait Characteristics in Patients With Low Back Pain. *Spine (Phila Pa 1976)* 2007;**32**:1329–36. doi:10.1097/BRS.0b013e318059af3b

- 60 Simmonds MJ, Lee CE, Etnyre BR, *et al.* The influence of pain distribution on walking velocity and horizontal ground reaction forces in patients with low back pain. *Pain Res Treat* 2012;**2012**:214980. doi:10.1155/2012/214980
- 61 Becker S, Bergamo F, Schnake KJ, *et al.* The relationship between functionality and erector spinae activity in patients with specific low back pain during dynamic and static movements. *Gait Posture* 2018;**66**:208–13. doi:10.1016/j.gaitpost.2018.08.042
- 62 da Fonseca JL, Magini M, De Freitas TH. Laboratory gait analysis in patients with low back pain before and after a Pilates Intervention. *J Sport Rehabil* 2009;**18**:269–82. doi:10.1123/jsr.18.2.269
- 63 Lamoth CJC, Meijer OG, Daffertshofer A, *et al.* Effects of chronic low back pain on trunk coordination and back muscle activity during walking: Changes in motor control. *Eur Spine J* 2006;**15**:23–40. doi:10.1007/s00586-004-0825-y
- 64 Al-Obaidi SM, Al-Zoabi B, Al-Shuwaie N, *et al.* The influence of pain and pain-related fear and disability beliefs on walking velocity in chronic low back pain. *Int J Rehabil Res* 2003;**26**:101–8. doi:10.1097/00004356-200306000-00004
- 65 Farahpour N, Jafarnezhad A, Damavandi M, *et al.* Gait ground reaction force characteristics of low back pain patients with pronated foot and able-bodied individuals with and without foot pronation. *J Biomech* 2016;**49**:1705–10. doi:10.1016/j.jbiomech.2016.03.056
- 66 Henchoz Y, Soldini N, Peyrot N, *et al.* Energetics and mechanics of walking in patients with chronic low back pain and healthy matched controls. *Eur J Appl Physiol* 2015;**115**:2433–43. doi:10.1007/s00421-015-3227-4
- 67 Vickers J, Reed A, Decker R, *et al.* Effect of investigator observation on gait parameters in individuals with and without chronic low back pain. *Gait Posture* 2017;**53**:35–40. doi:10.1016/j.gaitpost.2017.01.002
- 68 Keefe FJ, Hill RW. An objective approach to quantifying pain behavior and gait patterns in low back pain patients. *Pain* 1985;**21**:153–61.
- 69 Sung PS, Danial P. A Kinematic Symmetry Index of Gait Patterns between Older Adults with and Without Low Back Pain. *Spine (Phila Pa 1976)* 2017;**42**:E1350–6. doi:10.1097/BRS.0000000000002161
- 70 Teixeira Da Cunha-Filho I, Lima FC, Guimarães FR, *et al.* Use of physical performance tests in a group of Brazilian Portuguese-speaking individuals with low back pain. *Physiother Theory Pract* 2010;**26**:49–55. doi:10.3109/09593980802602844
- 71 Novy DM, Simmonds MJ, Olson SL, *et al.* Physical performance: Differences in men and women with and without low back pain. *Arch Phys Med Rehabil* 1999;**80**:195–8. doi:10.1016/S0003-9993(99)90121-1
- 72 Müller R, Ertelt T, Blickhan R, *et al.* Low back pain affects trunk as well as lower limb movements during walking and running. *J Biomech* 2015;**48**:1009–14. doi:10.1016/j.jbiomech.2015.01.042
- 73 Hamacher D, Hamacher D, Herold F, *et al.* Are there differences in the dual-task walking variability of minimum toe clearance in chronic low back pain patients and healthy controls? *Gait Posture* 2016;**49**:97–101. doi:10.1016/j.gaitpost.2016.06.026

- 74 Hamacher D, Hamacher D, Schega L. A cognitive dual task affects gait variability in patients suffering from chronic low back pain. *Exp Brain Res* 2014;**232**:3509–13. doi:10.1007/s00221-014-4039-1
- 75 Lamoth CJ, Stins JF, Pont M, *et al.* Effects of attention on the control of locomotion in individuals with chronic low back pain. *J Neuroeng Rehabil* 2008;**5**:13. doi:10.1186/1743-0003-5-13
- 76 Christe G, Kade F, Jolles BM, *et al.* Chronic low back pain patients walk with locally altered spinal kinematics. *J Biomech* 2017;**60**:211–8. doi:10.1016/j.jbiomech.2017.06.042
- 77 Gombatto SP, Brock T, DeLork A, *et al.* Lumbar spine kinematics during walking in people with and people without low back pain. *Gait Posture* 2015;**42**:539–44. doi:10.1016/j.gaitpost.2015.08.010
- 78 Bagheri R, Parhampour B, Pourahmadi M, *et al.* The Effect of Core Stabilization Exercises on Trunk-Pelvis Three-Dimensional Kinematics During Gait in Non-Specific Chronic Low Back Pain. *Spine (Phila Pa 1976)* 2019;**44**:927–36. doi:10.1097/BRS.0000000000002981
- 79 Lamoth CJC, Beek PJ, Meijer OG. Pelvis-thorax coordination in the transverse plane during gait. *Gait Posture* 2002;**16**:101–14. doi:10.1016/S0966-6362(01)00146-1
- 80 Prins MR, van der Wurff P, Meijer OG, *et al.* Mechanical Perturbations of the Walking Surface Reveal Unaltered Axial Trunk Stiffness in Chronic Low Back Pain Patients. *PLoS One* 2016;**11**:e0157253. doi:10.1371/journal.pone.0157253
- 81 Bagheri R, Takamjani IE, Pourahmadi MR, *et al.* Trunk–pelvis kinematics variability during gait and its association with trunk muscle endurance in patients with chronic low back pain. *J Appl Biomech* 2020;**36**:76–84. doi:10.1123/JAB.2019-0322
- 82 Kendall KD, Schmidt C, Ferber R. The relationship between hip-abductor strength and the magnitude of pelvic drop in patients with low back pain. *J Sport Rehabil* 2010;**19**:422–35.
- 83 Farahpour N, Jafarnezhadgero A, Allard P, *et al.* Muscle activity and kinetics of lower limbs during walking in pronated feet individuals with and without low back pain. *J Electromyogr Kinesiol* 2018;**39**:35–41. doi:10.1016/j.jelekin.2018.01.006
- 84 Rahimi A, Arab AM, Nourbakhsh MR, *et al.* Lower limb kinematics in individuals with chronic low back pain during walking. *J Electromyogr Kinesiol* 2020;**51**:102404. doi:10.1016/j.jelekin.2020.102404
- 85 Cimolin V, Vismara L, Galli M, *et al.* Effects of obesity and chronic low back pain on gait. *J Neuroeng Rehabil* 2011;**8**:55. doi:10.1186/1743-0003-8-55
- 86 MacRae CS, Critchley D, Lewis JS, *et al.* Comparison of standing postural control and gait parameters in people with and without chronic low back pain: a cross-sectional case-control study. *BMJ Open Sport Exerc Med* 2018;**4**:e000286–e000286. doi:10.1136/bmjsem-2017-000286
- 87 Jiménez-Del-Barrio S, Mingo-Gómez MT, Estébanez-De-Miguel E, *et al.* Adaptations in pelvis, hip and knee kinematics during gait and muscle extensibility in low back pain patients: A cross-sectional study. *J Back Musculoskelet Rehabil* 2020;**33**:49–56. doi:10.3233/BMR-191528



- 88 van den Hoorn W, Bruijn SM, Meijer OG, *et al.* Mechanical coupling between transverse plane pelvis and thorax rotations during gait is higher in people with low back pain. *J Biomech* 2012;**45**:342–7. doi:10.1016/j.jbiomech.2011.10.024
- 89 Huang Y, Meijer OG, Lin J, *et al.* The effects of stride length and stride frequency on trunk coordination in human walking. *Gait Posture* 2010;**31**:444–9. doi:10.1016/j.gaitpost.2010.01.019
- 90 Lamoth CJC, Daffertshofer A, Meijer OG, *et al.* How do persons with chronic low back pain speed up and slow down? Trunk-pelvis coordination and lumbar erector spinae activity during gait. *Gait Posture* 2006;**23**:230–9. doi:10.1016/j.gaitpost.2005.02.006
- 91 Selles RW, Wagenaar RC, Smit TH, *et al.* Disorders in trunk rotation during walking in patients with low back pain: A dynamical systems approach. *Clin Biomech* 2001;**16**:175–81. doi:10.1016/S0268-0033(00)00080-2
- 92 Ebrahimi S, Kamali F, Razeghi M, *et al.* Comparison of the trunk-pelvis and lower extremities sagittal plane inter-segmental coordination and variability during walking in persons with and without chronic low back pain. *Hum Mov Sci* 2017;**52**:55–66. doi:10.1016/j.humov.2017.01.004
- 93 Hines MG, Tillin NA, Luo J, *et al.* Passive elastic contribution of hip extensors to joint moments during walking in people with low back pain. *Clin Biomech* 2018;**60**:134–40.
- 94 Yazdani S, Dizji E, Alizadeh F, *et al.* Effect of chronic idiopathic low back pain on the kinetic gait characteristics in different foot masks. *J Biomech* 2018;**79**:243–7. doi:10.1016/j.jbiomech.2018.08.013
- 95 Pakzad M, Fung J, Preuss R. Pain catastrophizing and trunk muscle activation during walking in patients with chronic low back pain. *Gait Posture* 2016;**49**:73–7. doi:10.1016/j.gaitpost.2016.06.025
- 96 Hanada EY, Johnson M, Hubble-Kozey C. A comparison of trunk muscle activation amplitudes during gait in older adults with and without chronic low back pain. *PM R* 2011;**3**:920–8. doi:10.1016/j.pmrj.2011.06.002
- 97 Kim S-H, Park K-N, Kwon O-Y. Pain intensity and abdominal muscle activation during walking in patients with low back pain: The STROBE study. *Medicine (Baltimore)* 2017;**96**:e8250. doi:10.1097/MD.00000000000008250
- 98 van der Hulst M, Vollenbroek-Hutten MM, Rietman JS, *et al.* Lumbar and abdominal muscle activity during walking in subjects with chronic low back pain: Support of the ‘guarding’ hypothesis? *J Electromyogr Kinesiol* 2010;**20**:31–8. doi:10.1016/j.jelekin.2009.03.009
- 99 Arjunan SP, Kumar DK, Poon WM, *et al.* Variability in surface electromyogram during gait analysis of low back pain patients. *J Med Biol Eng* 2010;**30**:133–8.
- 100 Ansari B, Bhati P, Singla D, *et al.* Lumbar Muscle Activation Pattern During Forward and Backward Walking in Participants With and Without Chronic Low Back Pain: An Electromyographic Study. *J Chiropr Med* 2018;**17**:217–25. doi:10.1016/j.jcm.2018.03.008
- 101 Arendt-Nielsen L, Graven-Nielsen T, Sværre H, *et al.* The influence of low back pain on muscle activity and coordination during gait: a clinical and experimental study. *Pain* 1996;**64**:231–40. doi:0304-3959(95)00115-8 [pii]

- 102 van der Hulst M, Vollenbroek-Hutten MM, Rietman JS, *et al.* Back muscle activation patterns in chronic low back pain during walking: a 'guarding' hypothesis. *Clin J Pain* 2010;**26**:30–7. doi:10.1097/AJP.0b013e3181b40eca
- 103 Owen PJ, Miller CT, Mundell NL, *et al.* Which specific modes of exercise training are most effective for treating low back pain? Network meta-analysis. *Br J Sports Med* 2020;**54**:1279–87. doi:10.1136/bjsports-2019-100886
- 104 Kubo M, Holt KG, Saltzman E, *et al.* Changes in axial stiffness of the trunk as a function of walking speed. *J Biomech* 2006;**39**:750–7. doi:10.1016/j.jbiomech.2004.12.024
- 105 Anders C, Wagner H, Puta C, *et al.* Trunk muscle activation patterns during walking at different speeds. *J Electromyogr Kinesiol* 2007;**17**:245–52. doi:10.1016/j.jelekin.2006.01.002
- 106 Ceccato JC, de Sèze M, Azevedo C, *et al.* Comparison of trunk activity during gait initiation and walking in humans. *PLoS One* 2009;**4**. doi:10.1371/journal.pone.0008193
- 107 White SG, McNair PJ. Abdominal and erector spinae muscle activity during gait: The use of cluster analysis to identify patterns of activity. *Clin Biomech* 2002;**17**:177–84. doi:10.1016/S0268-0033(02)00007-4
- 108 Saunders SW, Schache A, Rath D, *et al.* Changes in three dimensional lumbo-pelvic kinematics and trunk muscle activity with speed and mode of locomotion. *Clin Biomech* 2005;**20**:784–93. doi:10.1016/j.clinbiomech.2005.04.004
- 109 MacDonald DA, Lorimer Moseley G, Hodges PW. The lumbar multifidus: Does the evidence support clinical beliefs? *Man Ther* 2006;**11**:254–63. doi:10.1016/j.math.2006.02.004
- 110 Radebold A, Cholewicki J, Panjabi MM, *et al.* Muscle response pattern to sudden trunk loading in healthy individuals and in patients with chronic low back pain. *Spine (Phila Pa 1976)* 2000;**25**:947–54. doi:10.1097/00007632-200004150-00009
- 111 Van Dieën JH, Selen LPJ, Cholewicki J. Trunk muscle activation in low-back pain patients, an analysis of the literature. *J Electromyogr Kinesiol* 2003;**13**:333–51. doi:10.1016/S1050-6411(03)00041-5
- 112 Marras WS, Davis KG, Ferguson SA, *et al.* Spine loading characteristics of patients with low back pain compared with asymptomatic individuals. *Spine (Phila Pa 1976)* 2001;**26**:2566–74. doi:10.1097/00007632-200112010-00009
- 113 Stokes IAF, Henry SM, Single RM. Surface EMG electrodes do not accurately record from lumbar multifidus muscles. *Clin Biomech* 2003;**18**:9–13. doi:10.1016/S0268-0033(02)00140-7
- 114 Marshall P, Murphy B. The validity and reliability of surface EMG to assess the neuromuscular response of the abdominal muscles to rapid limb movement. *J Electromyogr Kinesiol* 2003;**13**:477–89. doi:10.1016/S1050-6411(03)00027-0
- 115 Knox MF, Chipchase LS, Schabrun SM, *et al.* Anticipatory and compensatory postural adjustments in people with low back pain: a systematic review and meta-analysis. *Spine J* 2018;**18**:1934–49. doi:10.1016/j.spinee.2018.06.008
- 116 Laird RA, Gilbert J, Kent P, *et al.* Comparing lumbo-pelvic kinematics in people with and without back pain: a systematic review and meta-analysis. *BMC Musculoskelet Disord*

- 2014;**15**. doi:10.1186/1471-2474-15-229
- 117 Van Dieën JH, Peter Reeves N, Kawchuk G, *et al.* Analysis of motor control in patients with low back pain: A key to personalized care? *J Orthop Sports Phys Ther* 2019;**49**:380–8. doi:10.2519/jospt.2019.7916
- 118 Hartvigsen J, Hancock MJ, Kongsted A, *et al.* What low back pain is and why we need to pay attention. *Lancet* 2018;**391**:2356–67. doi:10.1016/S0140-6736(18)30480-X
- 119 Anukoolkarn K, Vongsirinavarat M, Bovonsunthonchai S, *et al.* Plantar pressure distribution pattern during mid-stance phase of the gait in patients with chronic non-specific low back pain. *J Med Assoc Thai* 2015;**98**:896–901.
- 120 Carvalho AR, Ribeiro Bertor WR, Briani RV, *et al.* Effect of Nonspecific Chronic Low Back Pain on Walking Economy: An Observational Study. *J Mot Behav* 2016;**48**:218–26. doi:10.1080/00222895.2015.1079162
- 121 Demirel A, Onan D, Oz M, *et al.* Moderate disability has negative effect on spatiotemporal parameters in patients with chronic low back pain. *Gait Posture* 2020;**79**:251–5. doi:10.1016/j.gaitpost.2020.05.015
- 122 Hamacher D, Hamacher D, Krowicki M, *et al.* Gait Variability in Chronic Back Pain Sufferers With Experimentally Diminished Visual Feedback: A Pilot Study. *J Mot Behav* 2016;**48**:205–8. doi:10.1080/00222895.2015.1073136
- 123 Healey EL, Fowler NE, Burden AM, *et al.* The influence of different unloading positions upon stature recovery and paraspinal muscle activity. *Clin Biomech (Bristol, Avon)* 2005;**20**:365–71. doi:10.1016/j.clinbiomech.2004.11.003
- 124 Hemmati L, Rojhani-Shirazi Z, Malek-Hoseini H, *et al.* Evaluation of Static and Dynamic Balance Tests in Single and Dual Task Conditions in Participants With Nonspecific Chronic Low Back Pain. *J Chiropr Med* 2017;**16**:189–94. doi:10.1016/j.jcm.2017.06.001
- 125 Henchoz Y, Soldini N, Peyrot N, *et al.* Energetics and mechanics of walking in patients with chronic low back pain and healthy matched controls. *Eur J Appl Physiol* 2015;**115**. doi:10.1007/s00421-015-3227-4
- 126 Kim T, Chai E. Trunk and pelvic coordination at various walking speeds during an anterior load carriage task in subjects with and without chronic low back pain. *J Phys Ther Sci* 2015;**27**:2353–6. doi:10.1589/jpts.27.2353
- 127 Lamoth CJC, Meijer OG, Wuisman PIJM, *et al.* Pelvis-Thorax Coordination in the Transverse Plane During Walking in Persons With Nonspecific Low Back Pain. *Spine (Phila Pa 1976)* 2002;**27**:E92–9. doi:10.1097/00007632-200202150-00016
- 128 Lee CE, Simmonds MJ, Novy DM, *et al.* Functional self-efficacy, perceived gait ability and perceived exertion in walking performance of individuals with low back pain. *Physiother Theory Pract* 2002;**18**:193–203. doi:10.1080/09593980290058553
- 129 Lee JH, Fell DW, Kim K. Plantar pressure distribution during walking: Comparison of subjects with and without chronic low back pain. *J Phys Ther Sci* 2011;**23**:923–6. doi:10.1589/jpts.23.923
- 130 Naliboff BD, Cohen MJ, Swanson GA, *et al.* Comprehensive assessment of chronic low back pain patients and controls: physical abilities, level of activity, psychological adjustment and pain perception. *Pain* 1985;:121–34.

- 131 Newell D, van der Laan M. Measures of complexity during walking in chronic non-specific low back pain patients. *Clin Chiropr* 2010;**13**:8–14. doi:10.1016/j.clch.2009.10.002
- 132 Queiroz BZ, Pereira DS, Rosa NM de B, *et al.* Functional performance and plasma cytokine levels in elderly women with and without low back pain. *J Back Musculoskeletal Rehabil* 2015;**28**:343–9. doi:10.3233/BMR-140526
- 133 Rodrigues CP, Silva RA da, Nasrala Neto E, *et al.* Analysis of Functional Capacity in Individuals With and Without Chronic Lower Back Pain Tt - Análise Da Capacidade Funcional Em Indivíduos Com E Sem Dor Lombar Crônica. *Acta Ortopédica Bras* 2017;**25**:143–6.
- 134 Ryan CG, Grant PMM, Dall PM, *et al.* Individuals with chronic low back pain have a lower level, and an altered pattern, of physical activity compared with matched controls: an observational study. *Aust J Physiother* 2009;**55**:53–8.
- 135 Simmonds MJ, Claveau Y. Measures of pain and physical function in patients with low back pain. *Physiother Theory Pract* 1997;**13**:53–65. doi:10.3109/09593989709036448
- 136 Simmonds JM, Olson SL, Jones S, *et al.* Psychometric characteristics and clinical usefulness of physical performance tests in patients with low back pain. *Spine (Phila Pa 1976)* 1998;**23**:2412–21.
- 137 Spenkelink CD, Hutten MMR, Hermens HJ, *et al.* Assessment of activities of daily living with an ambulatory monitoring system: A comparative study in patients with chronic low back pain and nonsymptomatic controls. *Clin Rehabil* 2002;**16**:16–26. doi:10.1191/0269215502cr463oa
- 138 Vickers J, Reed A, Decker R, *et al.* Effect of investigator observation on gait parameters in individuals with and without chronic low back pain. *Gait Posture* 2017;**53**:35–40. doi:10.1016/j.gaitpost.2017.01.002
- 139 Voloshin A, Wosk J. An in vivo study of low back pain and shock absorption in the human locomotor system. *J Biomech* 1982;**15**:21–7.
